# Supplementary material for: Corn cob and corn silk-based ingredients possess bioaccessible and antioxidant phenolic compounds displaying anti-inflammatory effects in vitro
Source: Royal Society of Chemistry journal article supplement (doi:10.1039/d4fo02968b), 2024-01-01
Supplement: d4fo02968b1.pdf [file d4fo02968b1.pdf]

**Food & Function**

**Electronic Supplementary Information**

**Corn cob and corn silk-based ingredients exhibit bioaccessible and antioxidant phenolic compounds displaying anti-inflammatory effects in vitro**

Yessica Rubí Hernández-García<sup>1</sup>, Iván Luzardo-Ocampo<sup>2,3,\*</sup>, Marcela Gaytán-Martínez<sup>1</sup>, Ma. Guadalupe Flavia Loarca-Piña<sup>1</sup>, Estela Vázquez Barrios<sup>1</sup>, Rocio Campos-Vega<sup>1,\*</sup>

<sup>1</sup>Research and Graduate Program in Food Science, School of Chemistry, Universidad Autónoma de Querétaro, 76010 Querétaro, Qro., Mexico.

<sup>2</sup>Tecnológico de Monterrey, Institute for Obesity Research, Ave. Eugenio Garza Sada 2501 Sur, 64849 Monterrey, Mexico.

<sup>3</sup>Tecnológico de Monterrey, School of Engineering and Sciences, Av. General Ramón Corona 2514, 45201 Zapopan, Mexico.

**\* Corresponding authors:**

Rocio Campos-Vega, e-mail: [chio\\_cve@yahoo.com.mx](mailto:chio_cve@yahoo.com.mx)

Ivan Luzardo-Ocampo, [ivanluzardo@tec.mx](mailto:ivanluzardo@tec.mx)

**Supplementary Table S1.** Binding energies between selected phenolic compounds and a model 1-palmitoyl-2-oleoyl-sn-glycero-3-phosphocholine (POPC), 1-palmitoyl-2-oleoyl-sn-glycero-3-phosphoethanoamine (POPE), and cholesterol membrane.

| <b>Phenolic compounds</b>    | <b>Gibbs' Free energy (<math>\Delta G</math>)</b> |
|------------------------------|---------------------------------------------------|
| <i>Hydroxybenzoic acids</i>  |                                                   |
| Gallic acid                  | -6.30                                             |
| 2,3-dihydroxybenzoic acid    | -6.40                                             |
| Syringic acid                | -6.40                                             |
| <i>Hydroxycinnamic acids</i> |                                                   |
| <i>p</i> -Coumaric acid      | -8.10                                             |
| Chlorogenic acid             | -8.60                                             |
| Ferulic acid                 | -7.30                                             |
| <i>Flavanols</i>             |                                                   |
| (+)-Catechin                 | -9.40                                             |

**Supplementary Table S2.** Main energy binding values between selected (poly)-phenols and inflammation targets at two experimental pH values (5.7 and 7.0) in a model of membrane instability.

| Compounds                    | PGE <sub>2</sub> |       | COX-2 |       | PPAR <sub>γ</sub> |       | PAF-R |       |
|------------------------------|------------------|-------|-------|-------|-------------------|-------|-------|-------|
|                              | pH               | pH    | pH    | pH    | pH                | pH    | pH    | pH    |
|                              | 5.7              | 7.0   | 5.7   | 7.0   | 5.7               | 7.0   | 5.7   | 7.0   |
| <i>Hydroxybenzoic acids</i>  |                  |       |       |       |                   |       |       |       |
| Gallic acid                  | -5.20            | -6.20 | -6.80 | -6.30 | -6.10             | -6.10 | -6.50 | -6.70 |
| 2,3-dihydroxybenzoic acid    | -5.80            | -4.90 | -6.40 | -6.30 | -6.70             | -5.80 | -6.30 | -6.40 |
| Syringic acid                | -5.20            | -5.20 | -6.30 | -6.0  | -5.50             | -5.70 | -6.70 | -5.10 |
| <i>Hydroxycinnamic acids</i> |                  |       |       |       |                   |       |       |       |
| <i>p</i> -Coumaric acid      | -6.80            | -6.00 | -6.70 | -6.70 | -7.10             | -6.70 | -7.30 | -7.20 |
| Chlorogenic acid             | -6.20            | -5.90 | -7.90 | -8.60 | -7.80             | -7.10 | -7.30 | -6.20 |
| Ferulic acid                 | -6.80            | -6.80 | -6.90 | -6.40 | -6.80             | -6.80 | -6.30 | -6.90 |
| <i>Flavanols</i>             |                  |       |       |       |                   |       |       |       |
| (+)-Catechin                 | -6.90            | -6.80 | -9.30 | -9.20 | -8.50             | -8.50 | -7.80 | -7.40 |

## ORAL PHASE

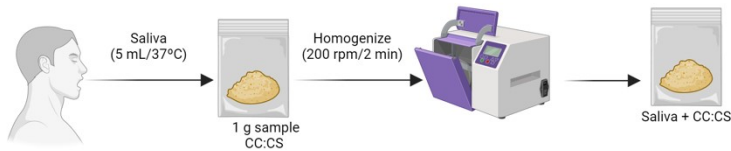

## GASTRIC PHASE

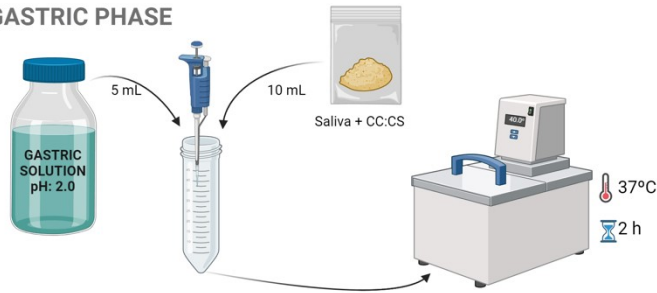

## INTESTINAL PHASE

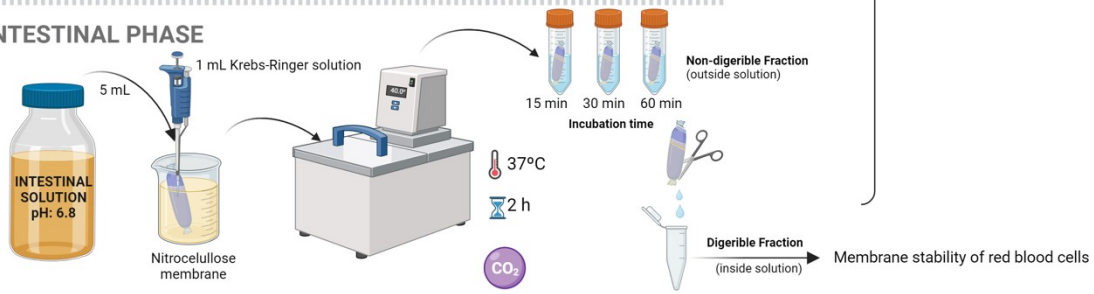

- Identification and quantification of phenolic compounds by HPLC-DAD.
- Antioxidant capacity:
  - ABTS
  - DPPH
  - FRAP

**Supplementary Fig. S1.** Schematic diagram *in vitro* gastrointestinal digestion

***In silico* cellular absorption in 3D-model membrane**

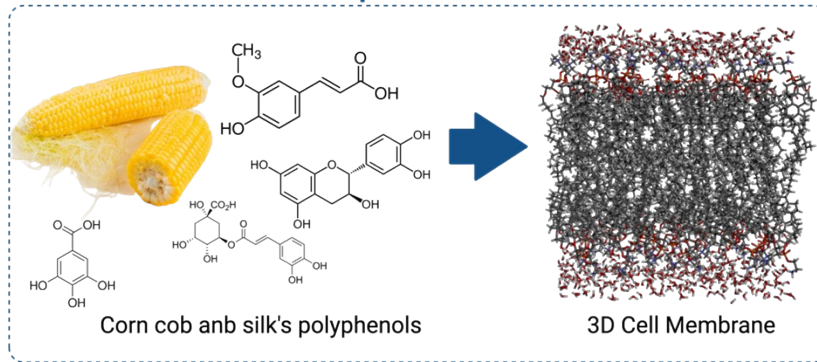

***In silico* docking between inflammation targets and absorbed polyphenols**

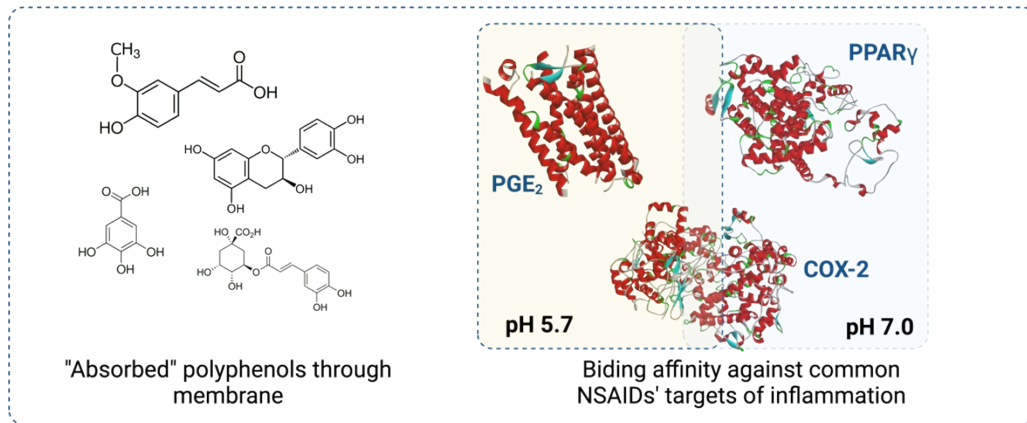

**Supplementary Fig. S2.** *In silico* analysis procedure
